# Supplementary material for: TOPSS: TOlerability of transcranial direct current stimulation in Pediatric Stroke Survivors
Source: Front Hum Neurosci. 2025 Aug 5;19:1629499. doi: 10.3389/fnhum.2025.1629499 (PMC12362507; doi:10.3389/fnhum.2025.1629499)
Supplement: Supplementary file 2 [file Table_2.XLSX]

## Sheet: Vital Signs and Peg Board Score
Participant ID	Treatment Day	Pre-stimulation Pulse (beats per minute)	Pre-stimulation systolic BP (mmHg)	Pre-stimulation diastolic BP	Pre- stimulation peg board affected hand	Pre-stimulation peg board unnaffected hand	Post- stimulation pulse	Post- stimulation systolic BP	Post- stimulation diastolic BP	Post- stimulation peg board affected hand	Post- stimulation peg board unnaffected hand	End of treatment pulse	End of treatment systolic BP	End of treatment diastolic BP	End of treatment peg board affected hand	End of treatment peg board unaffected hand
1	1	89	108	76	0	0.4	81	101	70	0	0.39	83	111	75	0	0.46
1	2	98	10	72	0	0.41	91	102	69	0	0.4	91	107	73	0	0.52
1	3	78	100	68	0	0.45	85	109	71	0	0.5	83	110	69	0.01	0.49
1	4	87	104	66	0	0.51	88	96	62	0	0.47	86	106	71	0.01	0.54
1	5	105	108	66	0	0.48	109	108	70	0	0.54	80	97	64	0	0.51
2	1	58	124	71	0.05	0.46	66	136	70	0.13	0.39	62	116	74	0.05	0.42
2	2	58	123	74	0.1	0.44	53	122	71	0.16	0.45	61	134	72	0.1	0.48
2	3	76	121	76	0.07	0.5	80	116	75	0.14	0.45	72	119	73	0.17	0.48
2	4	76	119	69	0.06	0.51	60	117	63	0.08	0.46	55	109	67	0.13	0.55
2	5	80	135	80	0.1	0.54	70	97	63	0.1	0.6	68	126	77	0.14	0.61
3	1	80	116	74	0	0.25	91	110	73	0	0.19	93	104	65	0.01	0.2
3	2	90	114	75	0	0.22	90	102	66	0	0.22	97	110	84	0.02	0.23
3	3	85	110	73	0.01	0.24	84	117	74	0	0.25	80	105	71	0.02	0.25
3	4	67	109	68	0	0.3	91	102	65	0	0.25	76	109	73	0	0.25
3	5	76	109	74	0	0.25	69	105	71	0.01	0.26	71	93	57	0	0.25
4	1	89	97	59	0.02	0.29	94	96	59	0.02	0.32	84	102	63	0.02	0.33
4	2	98	95	55	0.03	0.34	81	97	62	0.02	0.28	99	107	72	0.04	0.3
4	3	89	100	65	0.04	0.33	78	108	73	0.04	0.3	88	109	72	0.04	0.25
4	4	103	95	66	0.05	0.29	83	98	63	0.03	0.29	91	100	70	0.07	0.34
4	5	93	99	65	0.02	0.34	94	98	60	0.05	0.26	87	99	63	0.04	0.33
5	1	77	105	69	0.02	0.38	91	101	68	0.02	0.38	76	104	67	0.01	0.43
5	2	82	123	77	0.01	0.46	79	104	69	0	0.49	67	103	67	0.01	0.49
5	3	76	111	68	0.05	0.45	84	106	69	0.05	0.41	87	120	70	0.02	0.48
5	4	84	111	68	0.03	0.48	80	104	68	0.02	0.45	71	112	75	0.03	0.42
5	5	76	112	72	0.02	0.42	71	99	66	0.02	0.52	64	110	68	0.02	0.44

## Sheet: Day 1 Side Effects
Participant ID	Headache	Unusual feelings on the skin of your head	Neck Pain	Tingling	Itchiness	Sleepiness	Difficulty paying attention	Unusual feelings, attitude, emotions	Tooth Pain	Change in Hearing	Nausea/Sick to Stomach	Unusual twitches or muscle movements	Dizziness	Anxious/Worried/Nervous	Forgetful	Difficulty with your balance	Abnormal Sleep last night	Seizure within the last 24 hours
1	1	1	1	1	3	1	1	1	1	1	1	1	1	1	1	1	1	1	Yes
2	1	2	1	1	2	3	1	1	1	1	1	1	1	1	1	1	1	1	Yes
3	1	1	1	2	3	1	1	1	1	2	1	1	1	1	1	1	1	1	Yes
4	1	1	1	1	1	1	1	1	1	1	1	1	1	1	1	1	1	1	No
5	1	1	1	1	2	1	1	1	1	1	1	1	1	1	1	1	1	1	Yes
																			4/5 = 80%
1-absent
2-mild
3-moderate
4-severe

## Sheet: Day 2 Side Effects
Participant ID	Headache	Unusual feelings on the skin of your head	Neck Pain	Tingling	Itchiness	Sleepiness	Difficulty paying attention	Unusual feelings, attitude, emotions	Tooth Pain	Change in Hearing	Nausea/Sick to Stomach	Unusual twitches or muscle movements	Dizziness	Anxious/Worried/Nervous	Forgetful	Difficulty with your balance	Abnormal Sleep last night	Seizure within the last 24 hours
1	1	1	1	1	1	1	1	1	1	1	1	1	1	1	1	1	1	1	No
2	1	1	1	1	1	2	1	1	1	1	1	1	1	1	1	1	1	1	Yes
3	1	1	1	1	1	1	1	1	1	1	1	1	1	1	1	1	1	1	No
4	1	1	1	1	1	1	1	1	1	1	1	1	1	1	1	1	1	1	No
5	1	1	1	1	1	2	1	1	1	1	1	1	1	1	1	1	1	1	Yes
																			2/5 = 40%
1-absent
2-mild
3-moderate
4-severe

## Sheet: Day 3 Side Effects
Participant ID	Headache	Unusual feelings on the skin of your head	Neck Pain	Tingling	Itchiness	Sleepiness	Difficulty paying attention	Unusual feelings, attitude, emotions	Tooth Pain	Change in Hearing	Nausea/Sick to Stomach	Unusual twitches or muscle movements	Dizziness	Anxious/Worried/Nervous	Forgetful	Difficulty with your balance	Abnormal Sleep last night	Seizure within the last 24 hours
1	1	1	1	1	1	1	1	1	1	1	1	1	1	1	1	1	1	1	No
2	1	2	1	2	1	3	1	1	1	1	1	1	1	1	1	1	1		Yes
3	1	1	1	1	1	1	1	1	1	1	1	1	1	1	1	1	1	1	No
4	1	1	1	1	2	1	1	1	1	1	1	1	1	1	1	1	1	1	Yes
5	1	1	1	1	1	1	1	1	1	1	1	1	1	1	1	1	1	1	No
																			2/5 = 40%
1-absent
2-mild
3-moderate
4-severe

## Sheet: Day 4 Side Effects
Participant ID	Headache	Unusual feelings on the skin of your head	Neck Pain	Tingling	Itchiness	Sleepiness	Difficulty paying attention	Unusual feelings, attitude, emotions	Tooth Pain	Change in Hearing	Nausea/Sick to Stomach	Unusual twitches or muscle movements	Dizziness	Anxious/Worried/Nervous	Forgetful	Difficulty with your balance	Abnormal Sleep last night	Seizure within the last 24 hours
1	1	1	1	1	1	1	1	1	1	1	1	1	1	1	1	1	1	1	No
2	1	1	1	1	2	2	1	1	1	1	1	1	1	1	1	1	1	1	Yes
3	1	1	1	1	1	1	1	1	1	1	1	1	1	1	1	1	1	1	No
4	1	1	1	1	1	1	1	1	1	1	1	1	1	1	1	1	1	1	No
5	1	1	1	1	1	1	1	1	1	1	1	1	1	1	1	1	1	1	No
																			1/5 = 20%
1-absent
2-mild
3-moderate
4-severe

## Sheet: Day 5 Side Effects
Participant ID	Headache	Unusual feelings on the skin of your head	Neck Pain	Tingling	Itchiness	Sleepiness	Difficulty paying attention	Unusual feelings, attitude, emotions	Tooth Pain	Change in Hearing	Nausea/Sick to Stomach	Unusual twitches or muscle movements	Dizziness	Anxious/Worried/Nervous	Forgetful	Difficulty with your balance	Abnormal Sleep last night	Seizure within the last 24 hours
1	1	1	1	1	1	1	1	1	1	1	1	1	1	1	1	1	1	1	No
2	1	1	1	1	2	1	1	1	1	1	1	1	1	1	1	1	1	1	Yes
3	1	1	1	2	2	1	1	1	1	1	1	1	1	1	1	1	1	1	Yes
4	1	1	1	1	1	1	1	1	1	1	1	1	1	1	1	1	1	1	No
5	1	1	1	1	1	1	1	1	1	1	1	1	1	1	1	1	1	1	No
																			2/5 = 40%
1-absent
2-mild
3-moderate
4-severe
